# Supplementary material for: Cold-induced Arabidopsis FRIGIDA nuclear condensates for FLC repression
Source: PubMed Central journal article supplement (PMC8612926; doi:10.1038/s41586-021-04062-5), 2021-11-03

---

**Supplementary information**

---

**Cold-induced *Arabidopsis* FRIGIDA nuclear condensates for *FLC* repression**

---

In the format provided by the  
authors and unedited

Extended Data Fig. 5a

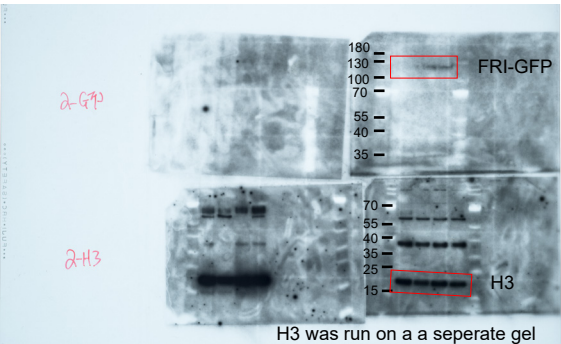

Extended Data Fig. 5d

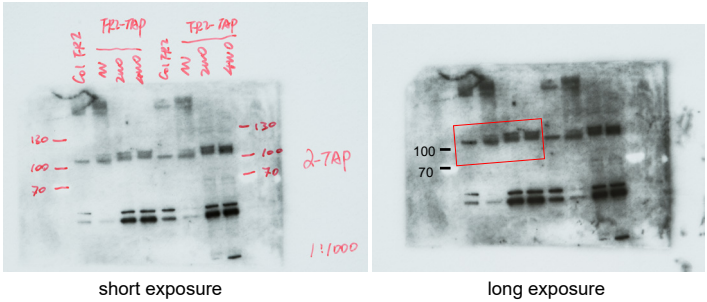

Extended Data Fig. 6b

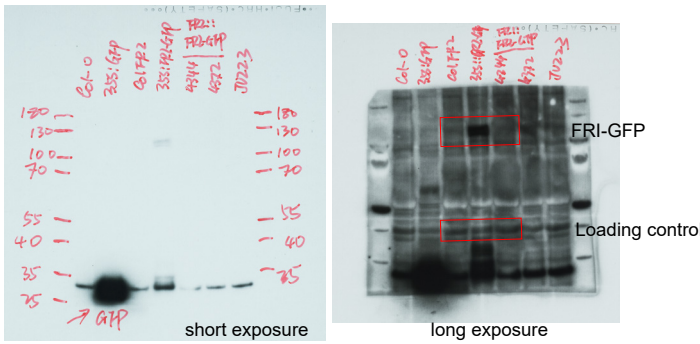

Extended Data Fig. 6c

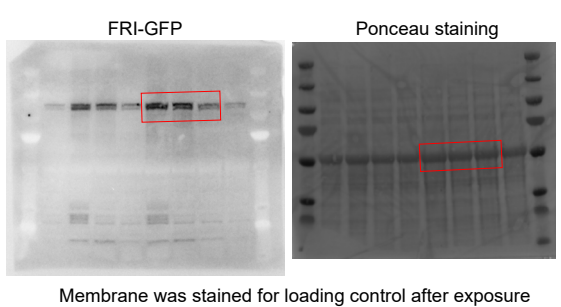

Extended Data Fig. 6f

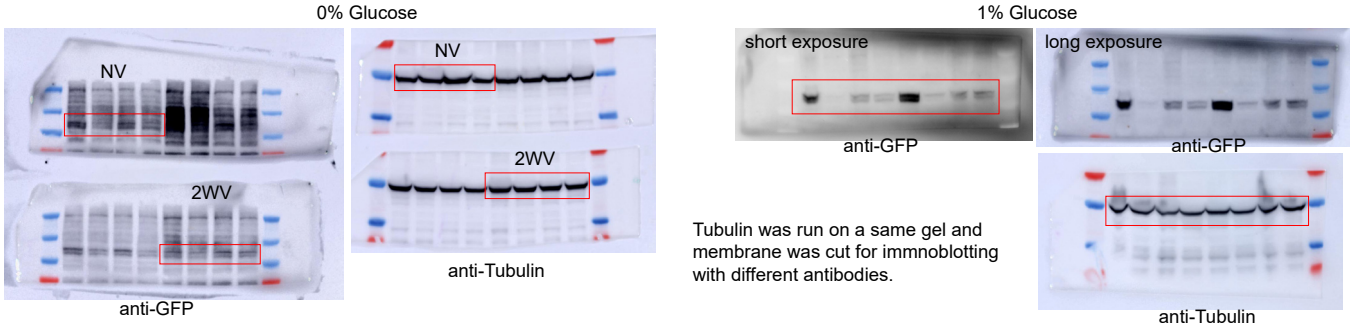

Extended Data Fig. 7d

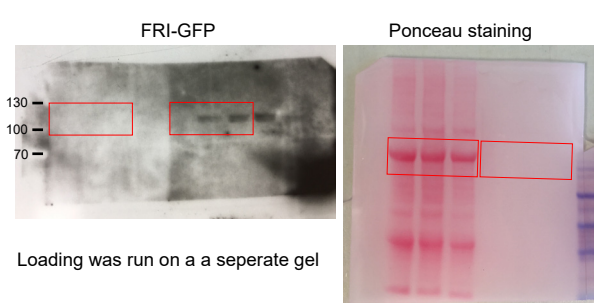

Supplement: 41586_2021_4062_MOESM1_ESM.pdf [file 41586_2021_4062_MOESM1_ESM.pdf]
